# Supplementary material
Source: PubMed Central journal article supplement (PMC8299183)
Supplement: mmc1.pdf [file mmc1.pdf]

**Supplemental information**

**Systemic IL-15, IFN- $\gamma$ , and IP-10/CXCL10 signature  
associated with effective immune response  
to SARS-CoV-2 in BNT162b2 mRNA vaccine recipients**

**Cristina Bergamaschi, Evangelos Terpos, Margherita Rosati, Matthew Angel, Jenifer Bear, Dimitris Stellas, Sevasti Karaliota, Filia Apostolakou, Tina Bagratuni, Dimitris Patseas, Sentiljana Gumeni, Ioannis P. Trougakos, Meletios A. Dimopoulos, Barbara K. Felber, and George N. Pavlakis**

**Table S1. Relevant history of vaccine recipients with pre-existing CoV-2 immunity, Related to Figure 1.**

|             | COVID Symptoms                  | COVID PCR test        | COVID Ab test                         |
|-------------|---------------------------------|-----------------------|---------------------------------------|
| Recipient 1 | March, 2020                     | Not done              | Not done                              |
| Recipient 2 |                                 | Not done              | Not done                              |
| Recipient 3 | Fever, fatigue, headache        | Positive (08/13/2020) | Positive (September, 2020)            |
| Recipient 4 | none                            |                       | Positive (May, 2020)                  |
| Recipient 5 | Flu-like symptoms<br>(May 2020) |                       | Positive (June, 2020; December, 2020) |

**Table S2. Cytokines and Chemokines tested, Related to Figures 2, 3, 4, and 5.**

|                                           |                          |
|-------------------------------------------|--------------------------|
| Analytes with changes (n=19)              | CRP (C-Reactive Protein) |
|                                           | Eotaxin (CCL11)          |
|                                           | IFN- $\gamma$            |
|                                           | IP-10 (CXCL10)           |
|                                           | IL-1Ra                   |
|                                           | IL-3                     |
|                                           | IL-6                     |
|                                           | IL-7                     |
|                                           | IL-8                     |
|                                           | IL-12/IL-23p40           |
|                                           | IL-15                    |
|                                           | IL-16                    |
|                                           | MCP-1 (CCL2)             |
|                                           | MDC (CCL22)              |
|                                           | MIP-1 $\alpha$ (CCL3)    |
|                                           | MIP-1 $\beta$ (CCL4)     |
|                                           | SAA (serum amyloid A)    |
|                                           | TNF- $\alpha$            |
|                                           | VEGF-A                   |
| Analytes with minimal or no change (n=8)  | Eotaxin-3                |
|                                           | ICAM-1                   |
|                                           | IL-17C                   |
|                                           | IL-17B                   |
|                                           | MCP-4                    |
|                                           | TARC                     |
|                                           | TSLP                     |
|                                           | VCAM-1                   |
| Analytes below detection threshold (n=14) | IL-1 $\alpha$            |
|                                           | IL-1 $\beta$             |
|                                           | IL-2                     |
|                                           | IL-4                     |
|                                           | IL-5                     |
|                                           | IL-9                     |
|                                           | IL-10                    |
|                                           | IL-12p70                 |
|                                           | IL-13                    |
|                                           | IL-17A                   |
|                                           | IL-17A/F                 |
|                                           | IL-17D                   |
|                                           | GM-CSF                   |
|                                           | TNF- $\beta$             |

**Table S3. Adverse effects elicited by mRNA vaccination, Related to Figures 2, 3, 4, and 5.**

| Adverse effects     | Vaccination 1<br>(40 vaccinees, %) | Vaccination 2<br>(50 vaccinees, %) |
|---------------------|------------------------------------|------------------------------------|
| injection site pain | 32 (80%)                           | 38 (76%)                           |
| fatigue             | 4 (10%)                            | 9 (18%)                            |
| headache            | 2 (5%)                             | 7 (14%)                            |
| myalgia             |                                    | 9 (18%)                            |
| fever, shivers      |                                    | 9 (18%)                            |
| diarrhea            | 1 (2.5%)                           |                                    |
| axillar pain        | 1 (2.5%)                           |                                    |
| dizziness           | 1 (2.5%)                           | 2 (4%)                             |

**Table S4. Correlations of anti-Spike antibodies at day 36 and cytokines log2 fold changes upon 2<sup>nd</sup> vaccination (d23-d22), Related to Figure 6.**

|                                        | Spike-RBD Antibody                 |                 |
|----------------------------------------|------------------------------------|-----------------|
|                                        | Spearman r correlation coefficient | <i>p</i> value* |
| <b>MIP-1<math>\alpha</math> (CCL3)</b> | <b>0.432</b>                       | <b>0.001</b>    |
| <b>IL-1Ra</b>                          | <b>0.334</b>                       | <b>0.013</b>    |
| MCP-1 (CCL2)                           | 0.241                              | 0.074           |
| <b>MIP-1<math>\beta</math> (CCL4)</b>  | <b>0.322</b>                       | <b>0.015</b>    |
| CRP (C-Reactive Protein)               | 0.167                              | 0.219           |
| <b>SAA (serum amyloid A)</b>           | <b>0.271</b>                       | <b>0.043</b>    |
| IP-10 (CXCL10)                         | 0.145                              | 0.285           |
| IL-6                                   | 0.21                               | 0.121           |
| TNF- $\alpha$                          | 0.103                              | 0.451           |
| <b>IFN-<math>\gamma</math></b>         | <b>0.433</b>                       | <b>0.001</b>    |
| <b>IL-15</b>                           | <b>0.389</b>                       | <b>0.003</b>    |
| IL-3                                   | -0.145                             | 0.29            |
| IL-7                                   | 0.24                               | 0.075           |
| IL-8                                   | 0.114                              | 0.402           |
| Eotaxin (CCL11)                        | 0.120                              | 0.377           |
| <b>MDC (CCL22)</b>                     | <b>0.394</b>                       | <b>0.003</b>    |
| <b>IL-12/IL-23p40</b>                  | <b>0.353</b>                       | <b>0.008</b>    |
| IL-16                                  | 0.248                              | 0.066           |
| <b>VEGF-A</b>                          | <b>0.303</b>                       | <b>0.023</b>    |

\* These univariate correlations were determined using a cut-off for a Spearman correlation coefficient corresponding to *p* value <0.05 (non-adjusted for multiple comparisons).

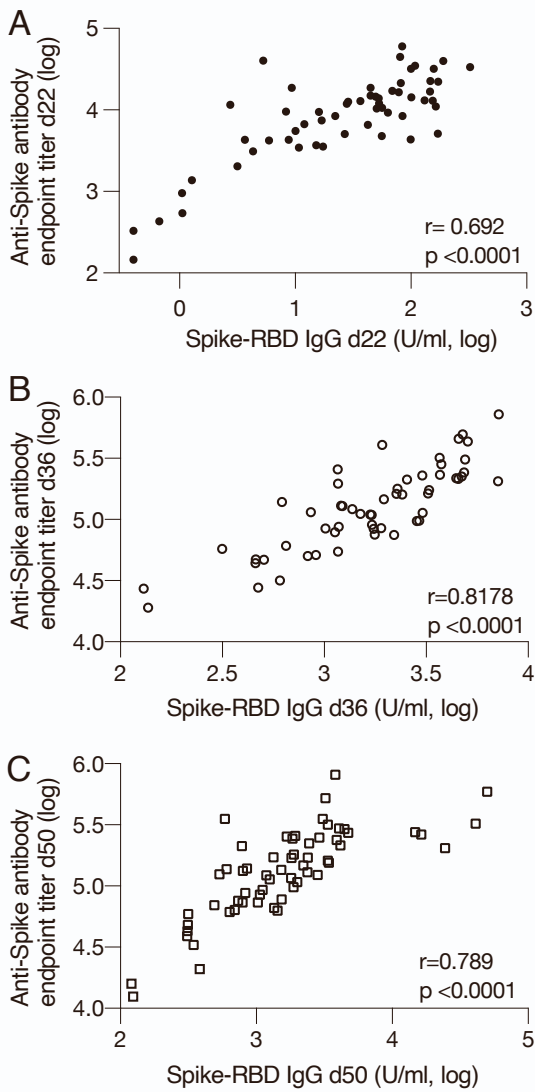

**Figure S1. Correlations of Spike and Spike-RBD antibodies, Related to Figure 1.**

Correlations of antibodies against full length trimeric Spike (ELISA, endpoint titer in log) and Spike-RBD (ROCHE, log) at day 22 (A), day 36 (B) and day 50 (C). Spearman  $r$  and  $p$  values are given (GraphPad Prism).

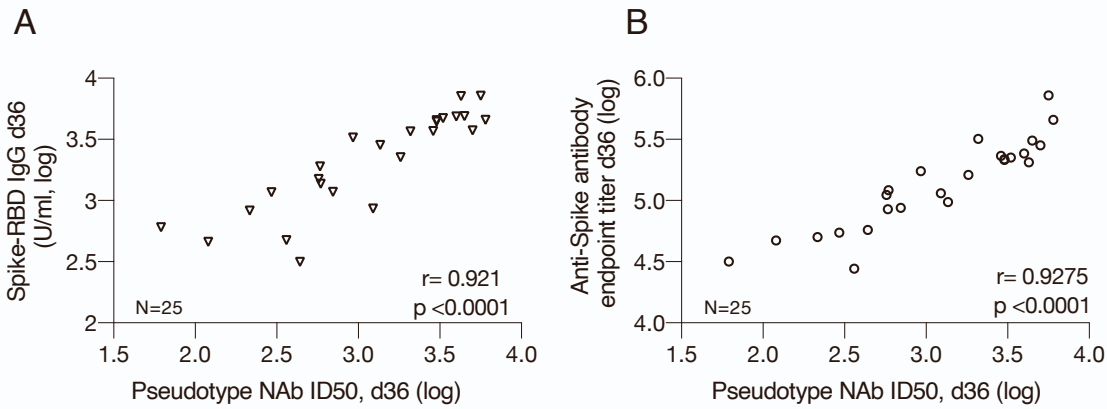

**Figure S2. Correlation of binding and neutralizing antibodies, Related to Figure 1.**

NAb assays were performed in using a HIV-1<sub>NL</sub>ΔEnv-NanoLuc derived pseudotype neutralization assay in HEK-ACE2 cells using Wuhan-Hu-1 Spike. using sera from a subset of naïve vaccinees (day 36) selected to cover a range of low to high responses. Correlations of (A) Spike-RBD (ROCHE, log) and (B) antibodies against full length trimeric Spike (ELISA, endpoint titer in log) and pseudotype NAb measured at day 36 (samples from Figure 1). Spearman  $r$  and  $p$  values are given (GraphPad Prism).

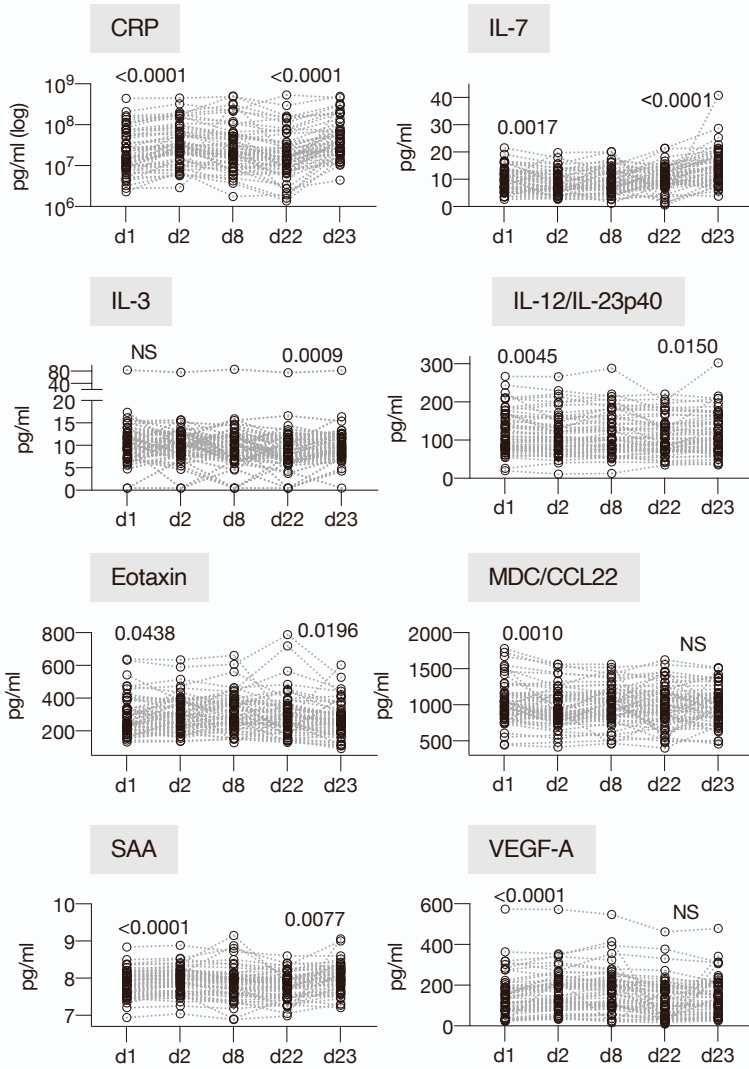

**Figure S3. Additional serum cytokine/chemokine levels affected by COVID-19 vaccination, Related to Figure 2.** Cytokine and chemokine levels were measured over time using the MSD assay as described in Figure 2 for the 58 COVID-19 naïve vaccine recipients. Serum levels of 8 of 19 analytes showing changes upon vaccination are plotted over time.



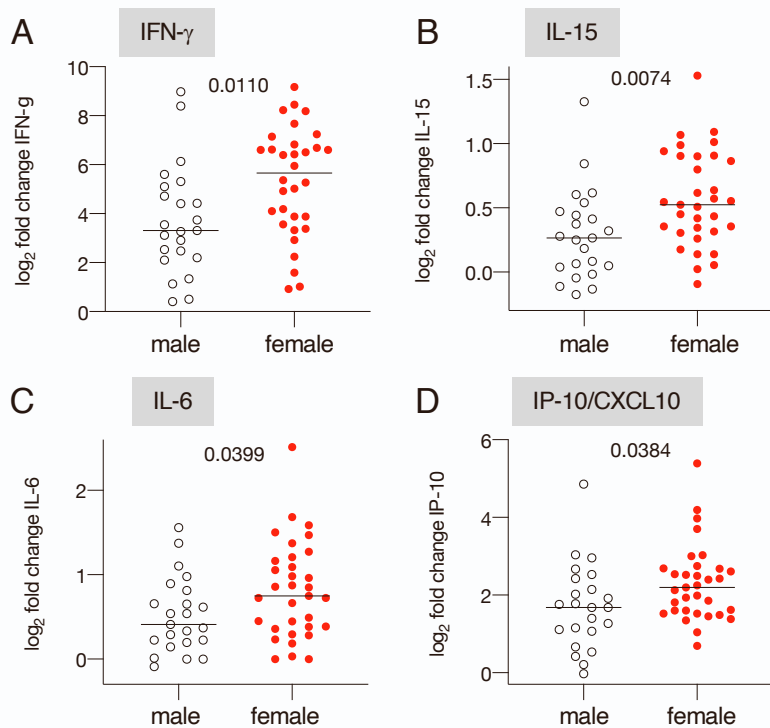

**Figure S4. Differential levels of cytokine in male and female vaccine recipients upon COVID-19 vaccination, Related to Figure 3.**

Comparison of log<sub>2</sub> fold changes after the 2<sup>nd</sup> vaccination (d23\_d22) in serum of (A) IFN- $\gamma$ , (B) IL-15, (C) IL-6 and (D) IP-10/CXCL10 which are significantly higher in female vaccine recipients (N=33) to male vaccine recipients (N=23) at one day after the 2<sup>nd</sup> vaccination (d23). P values are from unpaired non-parametric t test (Mann-Whitney).

Vaccination 1 (d2\_d1)

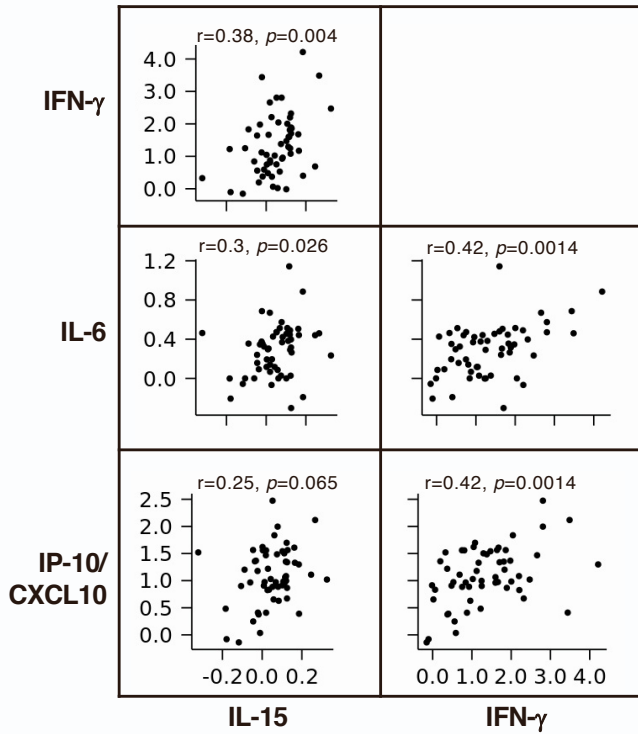

**Figure S5. Serum cytokine associations after the 1<sup>st</sup> vaccination in antigen-naïve vaccine recipients, Related to Figure 5.**

Correlations of log<sub>2</sub> fold changes of selected analytes after the 1<sup>st</sup> vaccination are shown. r and non-adjusted p value for the individual correlations are shown in the plots.

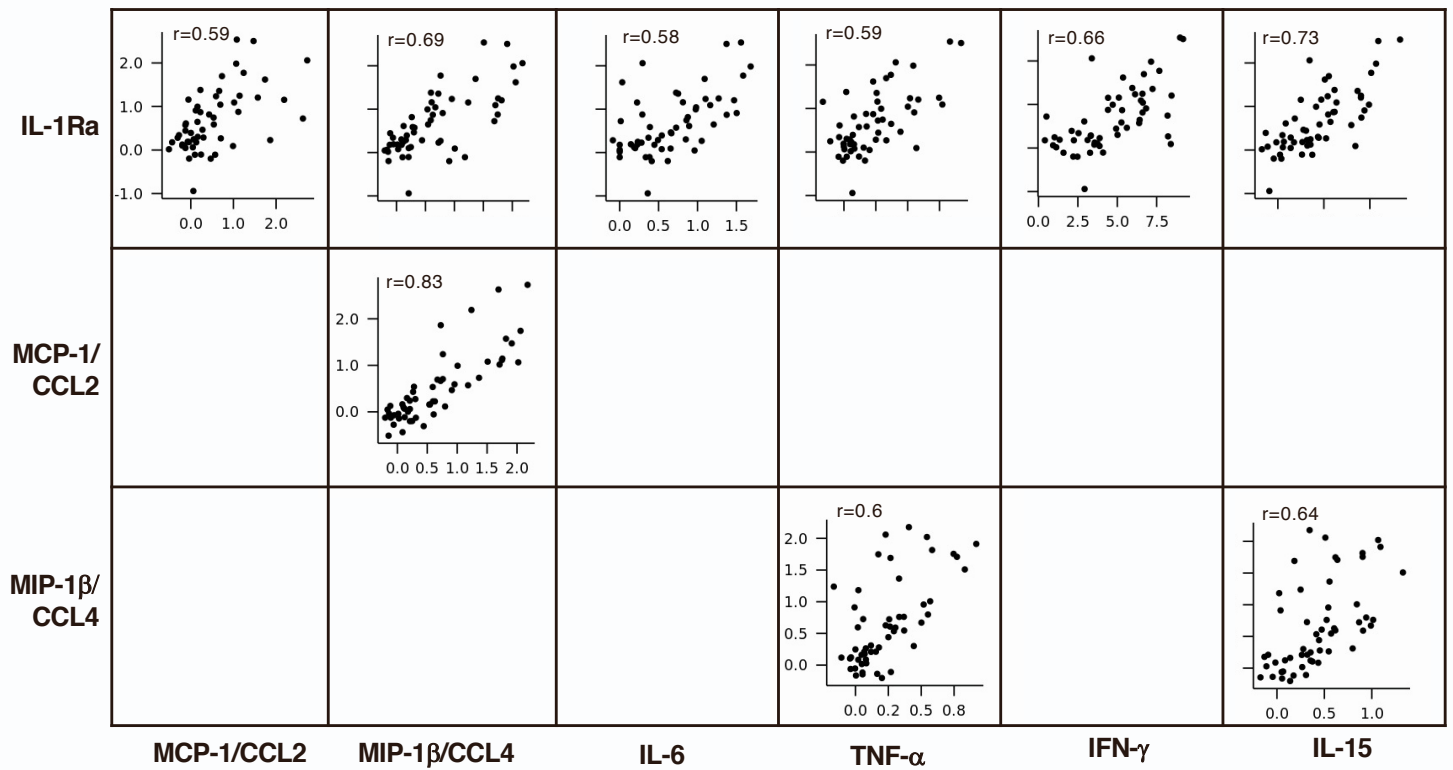

**Figure S6. Coordinated vaccine response featuring inflammatory molecules and chemokines, Related to Figure 5.**

Correlations of log<sub>2</sub> fold changes of selected analytes after the 2<sup>nd</sup> vaccination are shown derived from data depicted in heatmap in Figure 5A (grey box).  $r$  is shown in plots; all correlations are characterized by an adjusted  $p < 0.05$ .
